# Supplementary material for: Disengaging spinal afferent nerve communication with the brain in live mice
Source: PubMed Central journal article supplement (PMC9475039; doi:10.1038/s42003-022-03876-x), 2022-09-14
Supplement: 42003_2022_3876_MOESM3_ESM.pdf [file 42003_2022_3876_MOESM3_ESM.pdf]

## Reporting Summary

Nature Portfolio wishes to improve the reproducibility of the work that we publish. This form provides structure for consistency and transparency in reporting. For further information on Nature Portfolio policies, see our [Editorial Policies](#) and the [Editorial Policy Checklist](#).

### Statistics

For all statistical analyses, confirm that the following items are present in the figure legend, table legend, main text, or Methods section.

n/a Confirmed

- The exact sample size ( $n$ ) for each experimental group/condition, given as a discrete number and unit of measurement
- A statement on whether measurements were taken from distinct samples or whether the same sample was measured repeatedly
- The statistical test(s) used AND whether they are one- or two-sided  
*Only common tests should be described solely by name; describe more complex techniques in the Methods section.*
- A description of all covariates tested
- A description of any assumptions or corrections, such as tests of normality and adjustment for multiple comparisons
- A full description of the statistical parameters including central tendency (e.g. means) or other basic estimates (e.g. regression coefficient) AND variation (e.g. standard deviation) or associated estimates of uncertainty (e.g. confidence intervals)
- For null hypothesis testing, the test statistic (e.g.  $F$ ,  $t$ ,  $r$ ) with confidence intervals, effect sizes, degrees of freedom and  $P$  value noted  
*Give  $P$  values as exact values whenever suitable.*
- For Bayesian analysis, information on the choice of priors and Markov chain Monte Carlo settings
- For hierarchical and complex designs, identification of the appropriate level for tests and full reporting of outcomes
- Estimates of effect sizes (e.g. Cohen's  $d$ , Pearson's  $r$ ), indicating how they were calculated

*Our web collection on [statistics for biologists](#) contains articles on many of the points above.*

### Software and code

Policy information about [availability of computer code](#)

Data collection  
 LabChart (v 7; ADInstruments)  
 Spike2 (v 7.20; Cambridge Electronic Design)  
 AnalySIS Image (v 5.0; Olympus-SIS, Münster, Germany)  
 NDPview2 (v U12388-21)

Data analysis  
 Fiji 354 Image J (v 1.52p)  
 LabChart (v 7; ADInstruments)  
 Spike2 (v 7.20; Cambridge Electronic Design)  
 PyCharm (v 2019.3.4)  
 QuPath (v 0.1.2)  
 GraphPad Prism (v 9.3.1)

For manuscripts utilizing custom algorithms or software that are central to the research but not yet described in published literature, software must be made available to editors and reviewers. We strongly encourage code deposition in a community repository (e.g. GitHub). See the Nature Portfolio [guidelines for submitting code & software](#) for further information.

## Data

Policy information about [availability of data](#)

All manuscripts must include a [data availability statement](#). This statement should provide the following information, where applicable:

- Accession codes, unique identifiers, or web links for publicly available datasets
- A description of any restrictions on data availability
- For clinical datasets or third party data, please ensure that the statement adheres to our [policy](#)

The datasets generated during and/or analysed during the current study are available from the corresponding author on reasonable request.

## Field-specific reporting

Please select the one below that is the best fit for your research. If you are not sure, read the appropriate sections before making your selection.

- Life sciences       Behavioural & social sciences       Ecological, evolutionary & environmental sciences

For a reference copy of the document with all sections, see [nature.com/documents/nr-reporting-summary-flat.pdf](https://nature.com/documents/nr-reporting-summary-flat.pdf)

## Life sciences study design

All studies must disclose on these points even when the disclosure is negative.

|                 |                                                                                                                                                                                                                                                                                                                                                  |
|-----------------|--------------------------------------------------------------------------------------------------------------------------------------------------------------------------------------------------------------------------------------------------------------------------------------------------------------------------------------------------|
| Sample size     | Sample sizes were based on 25% of measurement variance explained by the treatment effect (the minimum effect of interest), and a within group variance of 20% (effect size $f = 1.12$ ). Repeated measures ANOVA with 2 groups with an alpha error probability of 5% and power of 95% gives a minimum sample size of 5 replicates in each group. |
| Data exclusions | No data were excluded.                                                                                                                                                                                                                                                                                                                           |
| Replication     | Standard replication of measurements were performed for all experiments. Depletion of colonic CGRP was additionally replicated at multiple time points with independent experimental cohorts.                                                                                                                                                    |
| Randomization   | Mice were allocated to experimental or sham control groups in an alternating manner. The only selection criteria was based on age range (3-6 months); applied equally to both groups.                                                                                                                                                            |
| Blinding        | Sham and experimental mice were externally indistinguishable, enabling blinding during data collection and analysis. Surgery and data collection/analysis were performed by independent researchers.                                                                                                                                             |

## Reporting for specific materials, systems and methods

We require information from authors about some types of materials, experimental systems and methods used in many studies. Here, indicate whether each material, system or method listed is relevant to your study. If you are not sure if a list item applies to your research, read the appropriate section before selecting a response.

### Materials & experimental systems

| n/a                                 | Involved in the study                                           |
|-------------------------------------|-----------------------------------------------------------------|
| <input type="checkbox"/>            | <input checked="" type="checkbox"/> Antibodies                  |
| <input checked="" type="checkbox"/> | <input type="checkbox"/> Eukaryotic cell lines                  |
| <input checked="" type="checkbox"/> | <input type="checkbox"/> Palaeontology and archaeology          |
| <input type="checkbox"/>            | <input checked="" type="checkbox"/> Animals and other organisms |
| <input checked="" type="checkbox"/> | <input type="checkbox"/> Human research participants            |
| <input checked="" type="checkbox"/> | <input type="checkbox"/> Clinical data                          |
| <input checked="" type="checkbox"/> | <input type="checkbox"/> Dual use research of concern           |

### Methods

| n/a                                 | Involved in the study                           |
|-------------------------------------|-------------------------------------------------|
| <input checked="" type="checkbox"/> | <input type="checkbox"/> ChIP-seq               |
| <input checked="" type="checkbox"/> | <input type="checkbox"/> Flow cytometry         |
| <input checked="" type="checkbox"/> | <input type="checkbox"/> MRI-based neuroimaging |

## Antibodies

|                 |                                                                                                                                                                                                                                                                                                                                     |
|-----------------|-------------------------------------------------------------------------------------------------------------------------------------------------------------------------------------------------------------------------------------------------------------------------------------------------------------------------------------|
| Antibodies used | Anti-CGRP (polyclonal, raised in rabbit against the full length rat alpha CGRP peptide; Bachem, cat #T-4032, formerly "IHC-6006" from Peninsula Laboratories International Inc.; lot A17601).<br>Donkey anti-rabbit Cy3; 7.5 µg/ml; Jackson ImmunoResearch Laboratories Inc. cat #711-165-152; lot 133645                           |
| Validation      | The CGRP antibody recognized a single band of ~14 kDa, corresponding to CGRP's molecular weight, on western blots of horse ileum homogenates (Russo et al., 2010). Preabsorption of the diluted antibody with the immunogen abolishes staining in horse spinal cord, dorsal root ganglia, and intestine (Domeneghini et al., 2004). |

Domeneghini C, Radaelli G, Arrighi S, Bosi G, Dolera M (2004) Cholinergic, nitrenergic and peptidergic (Substance P-and CGRP-utilizing) innervation of the horse intestine. A histochemical and immunohistochemical study. *Histology and Histopathology* 19:357-370.  
Russo D, Bombardi C, Grandis A, Furness JB, Spadari A, Bernardini C, Chiocchetti R (2010) Sympathetic innervation of the ileocecal junction in horses. *Journal of Comparative Neurology* 518:4046-4066

## Animals and other organisms

Policy information about [studies involving animals](#); [ARRIVE guidelines](#) recommended for reporting animal research

|                         |                                                                                                                  |
|-------------------------|------------------------------------------------------------------------------------------------------------------|
| Laboratory animals      | Mice C57BL6/J of either sex; 3-6 months old                                                                      |
| Wild animals            | No wild animals.                                                                                                 |
| Field-collected samples | No field-collected samples.                                                                                      |
| Ethics oversight        | Procedures were approved by the Animal Welfare Committee of Flinders University (approvals #861-13 and #933-16). |

Note that full information on the approval of the study protocol must also be provided in the manuscript.
